# Supplementary material for: Prognostic signature and immune efficacy of m1A‐, m5C‐ and m6A‐related regulators in cutaneous melanoma
Source: PubMed Central journal article supplement (PMC8419166; doi:10.1111/jcmm.16800), 2021-07-21
Supplement: JCMM-25-8405-s006.pdf [file JCMM-25-8405-s006.pdf]

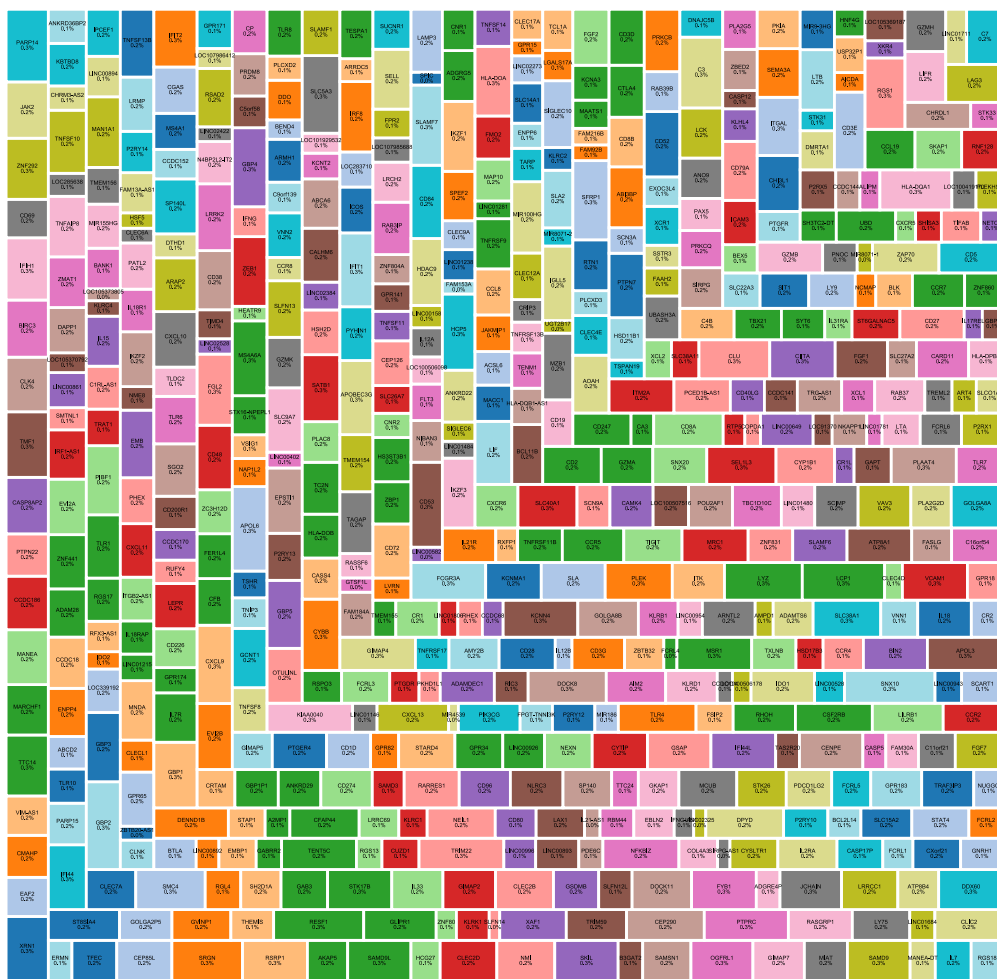

Figure S3 Gene expression treemap of DEGs from the regulators-related risk subgroups.
